# Supplementary material
Source: HighWire-hosted journal article supplement (doi:10.1101/rna.042663.113)
Supplement: SuppMaterial.docx [file SuppMaterial.docx]

**Supplementary Materials and Methods**

**Supplemental Figures**

**Supplemental Figure 1: Comparison of total fluorescence readings from representative deletion mutants.** To describe the trend of the changes in both GFP and mCherry fluorescent signals, we plotted a number of mutants from Figures 3 and 4 based on the mean mCherry and GFP value in arbitrary fluorescence units for the 21,000 cells analyzed by flow cytometry. Note the scale of the inset graph is different that the scale for the larger graph, with the breaks in axes noted with a tilde. The arrows describe a vector for the average fluorescence change in the corresponding mutant group, with the arrowhead representing the actual average value for the mutant group. Explanations for the overall shifts can be found in the Results section of the paper.

**Supplemental Figure 2: Nonessential translation-related deletion mutants have a minimal effect on reporter expression**. As in Figures 3 and 4, flow cytometry data from the indicated nonessential mutants were individually plotted and overlaid onto a grayscale dataset from wild-type cells. GFP and mCherry fluorescence are shown on the x- and y-axis respectively.

**Supplemental Figure 3: *CUP1*-Reporter expression in different culture conditions.** Wild-type cells harboring the *CUP1*-Reporter described in Figure 5 were induced with 1 mM CuSO4, distributed into different growth vessels, and induced for 4 hours. Cells were then analyzed via flow cytometry (*A*). We also compared reporter expression in 96- and 384-well plates when grown without shaking (*B*).

**Supplemental Figure 4: Description of binning and clustering process.** Flow cytometry data (*A*) is exported from FlowJo and imported into SAS. An algorithm then sorts the individual cells within the phenograph into *n* x *n* bins (*B*) and reports the number of cells in each bins. The bins are ordered starting from the origin (see arrows) and up the y-axis. It shifts rightward to the next column, goes up again etc., ending with the top right bin. These data are then exported as a .txt file, imported into Cluster, and then analyzed similar to microarray data, as in Figures 6 and 7. The occupancy patterns are shown for our fluorescence controls (*C*) to demonstrate the binning pattern.

**Gene expression reporter cloning and sequence**

The region from EX1 through EX2 (640-1598) was commercially synthesized (Mr. Gene; Regensburg Germany) and cloned into the BamHI site of pRS316-*TDH3*-eGFP (derived from pRS316-*RPL25*-GFP) by replacing the *RPL25* promoter and ORF with the TDH3 promoter (31-639) using BamHI and NotI restriction enzymes. In the design, we removed an inhibitory sequence (Swida et al. 1988) within the *CYH2* intron and positioned a yeast codon optimized mCherry ORF (nucleotides 763-1470 in the sequence below) upstream of the branch point sequence (1526-1532) which removed 32 bp from the intron. The mCherry ORF was placed in frame with EX1 and a stop codon was placed immediately at the end of the mCherry ORF. The resulting plasmid contains a small portion of the *CYH2* EX2 fused in frame with the eGFP ORF (1600-2322).

The sequence of the reporter gene is below. This construct was cloned into the a suite of pRS vectors (Sikorski and Hieter 1989) using BamHI/SalI; ensuring maximal utility. Colored text refers to the identified features noted above. Underlined bases are those that were mutated for the branch point mutant and 3’ splice site mutant and the 5’ GT and 3’ AG intron boundaries are in lower-case text.

GCGGCCGCGAATTCACTAGTGATTCTCGAGTAACTTTATTTAGTCAAAAAATTAGCCTTTTAATTCTGCTGTAACCCGTACATGCCCAAAATAGGGGGCGGGTTACACAGAATATATAACATCGTAGGTGTCTGGGTGAACAGTTTATTCCTGGCATCCACTAAATATAATGGAGCCCGCTTTTTAAGCTGGCATCCAGAAAAAAAAAGAATCCCAGCACCAAAATATTGTTTTCTTCACCAACCATCAGTTCATAGGTCCATTCTCTTAGCGCAACTACAGAGAACAGGGGCACAAACAGGCAAAAAACGGGCACAACCTCAATGGAGTGATGCAACCTGCCTGGAGTAAATGATGACACAAGGCAATTGACCCACGCATGTATCTATCTCATTTTCTTACACCTTCTATTACCTTCTGCTCTCTCTGATTTGGAAAAAGCTGAAAAAAAAGGTTGAAACCAGTTCCCTGAAATTATTCCCCTACTTGACTAATAAGTATATAAAGACGGTAGGTATTGATTGTAATTCCGTAAATCTATTTCTTAAACTTCTTAAATTCTACTTTTATAGTTAGTCTTTTTTTTAGTTTTAAAACACCAAGAACTTAGTTTCGAATAAACACACATAAACAAACAAAGGATCCATGTCTTCCAGATTCACTAAGACTAGAAAGCACAGAGGTCACGTCTCAGGgtATGTAGTTCCATTTGGAAGAGGGAATGAAAGAACCAAATATGTCGTGTGTATATCATGGTACAGCATGCTTTCTAAGGGTGAAGAAGACAACATGGCTATCATCAAGGAATTCATGAGATTCAAGGTTCACATGGAAGGTTCTGTTAACGGTCACGAATTCGAAATCGAAGGTGAAGGTGAAGGTAGACCATACGAAGGTACCCAAACCGCTAAGTTGAAGGTTACCAAGGGTGGTCCATTGCCATTCGCTTGGGACATCTTGTCTCCACAATTCATGTACGGTTCTAAGGCTTACGTTAAGCACCCAGCTGACATCCCAGACTACTTGAAGTTGTCTTTCCCAGAAGGTTTCAAGTGGGAAAGAGTTATGAACTTCGAAGACGGTGGTGTTGTTACCGTTACCCAAGACTCTTCTTTGCAAGACGGTGAATTCATCTACAAGGTTAAGTTGAGAGGTACCAACTTCCCATCTGACGGTCCAGTTATGCAAAAGAAGACTATGGGTTGGGAAGCTTCTTCTGAAAGAATGTACCCAGAAGACGGTGCTTTGAAGGGTGAAATCAAGCAAAGATTGAAGTTGAAGGACGGTGGTCACTACGACGCTGAAGTTAAGACCACCTACAAGGCTAAGAAGCCAGTTCAATTGCCAGGTGCTTACAACGTTAACATCAAGTTGGACATCACCTCTCACAACGAAGACTACACCATCGTTGAACAATACGAAAGAGCTGAAGGTAGACACTCTACCGGTGGTATGGACGAATTGTACACTTAAGAGTTACCACGTTTCTTTTGTTTCGATAAAATGTCCAGTTGAAAACCTGTTTTACTAACGATTTAAAAATTGTATTTCATTACAATATTTTTTTTGTACagCCGGTTAAGGTCGTATCGGAGATCCATGGTGAGCAAGGGCGAGGAGCTGTTCACCGGGGTGGTGCCCATCCTGGTCGAGCTGGACGGCGACGTAAACGGCCACAAGTTCAGCGTGTCCGGCGAGGGCGAGGGCGATGCCACCTACGGCAAGCTGACCCTGAAGTTCATCTGCACCACCGGCAAGCTGCCCGTGCCCTGGCCCACCCTCGTGACCACCCTGACCTACGGCGTGCAGTGCTTCAGCCGCTACCCCGACCACATGAAGCAGCACGACTTCTTCAAGTCCGCCATGCCCGAAGGCTACGTCCAGGAGCGCACCATCTTCTTCAAGGACGACGGCAACTACAAGACCCGCGCCGAGGTGAAGTTCGAGGGCGACACCCTGGTGAACCGCATCGAGCTGAAGGGCATCGACTTCAAGGAGGACGGCAACATCCTGGGGCACAAGCTGGAGTACAACTACAACAGCCACAACGTCTATATCATGGCCGACAAGCAGAAGAACGGCATCAAGGTGAACTTCAAGATCCGCCACAACATCGAGGACGGCAGCGTGCAGCTCGCCGACCACTACCAGCAGAACACCCCCATCGGCGACGGCCCCGTGCTGCTGCCCGACAACCACTACCTGAGCACCCAGTCCGCCCTGAGCAAAGACCCCAACGAGAAGCGCGATCACATGGTCCTGCTGGAGTTCGTGACCGCCGCCGGGATCACTCTCGGCATGGACGAGCTGTACAAGAGATCCTAAGCTGGTTCTAACTGGAAATAATTTCCATTAGATTCCTCTTTTTCTCGTCCATTAACCAAAATATATTATTGAATTCAGCGGTTCCTTTTTTCTCATTTTCGCATATAGCTGCACTATTAGAATCAGCCCACTCTAGGTAAACACAGTTCCTCGATATACCTCTGTCTTACTATCAGTGGTTAAACCTTATGCAAATATAATATATATATATATATATATATATATATCTCATACTTTTGTTGATTCTTGTGTAATTATTGGAAAAGACAAAACAAAGCAAGCGTTTCTATTCATATTTACAAGTATTTTTTATGACAAACTATTTCTTAATTTTCCCACCGGCGGCTTTGAATAAGGCAATGTGTCGAC

**Site-directed PCR mutagenesis**

Primers were designed to both incorporate the desired mutation and to amplify the template plasmid. Reaction conditions were as described previously (Barnes 1994). PCR cycling was performed at 95°C 1 minute followed by 17 cycles of [95°C 50 seconds, 45°C - 65°C 50 seconds, 70°C (1.25 min/Kb of template)] followed by incubation at 70°C for one elongation-length step. Reactions were treated with the restriction enzyme DpnI to destroy the template plasmid and were transformed into competent *E. coli*. Mutant plasmids were screened by diagnostic restriction enzyme digest and sequencing.

**Robotic high-throughput 96-well yeast transformation**

We adapted the standard lithium acetate (Gietz and Woods 2002) and microplate methods (Gietz and Schiestl 2007) to utilize robotic techniques and increase transformation efficiency and speed. Except where noted, liquid handling was performed using a BioMek FX laboratory automation workstation (Beckman Coulter). 96-well plates containing cryogenically preserved yeast strains were thawed and small volumes transferred to a 96-well plate containing 150 µl/well fresh YPD medium supplemented with 200 µg/ml G418 (effective concentration; Gibco) using sterile pin replicators. Strains were grown for 16-20 hours at 31°C and breathable sealing film (Axygen) was used to minimize cross contamination. Cells were pelleted and washed twice with 100 mM lithium acetate, then mixed with a pin replicator in pre-warmed transformation master mix (33.3% PEG 8000, 100 mM lithium acetate, 2 mg/mL salmon sperm DNA and 500ng plasmid/reaction at 42°C). Plates were incubated at 42°C for 45 minutes, washed twice with ddH2O and resuspended in 50 µl ddH2O. To select for transformants, 20% of the cell suspension was spotted onto solid minimal selecting for the plasmid (SD-uracil + 200 µg/mL G418). The remaining 80% of cell suspension was cryogenically preserved by adding an equal volume of 50% glycerol and stored at -80°C. If transformants were not obtained in the initial 20% spot plating, the remaining transformation mixture was thawed and spread onto selective media.

**Supplemental Materials References**

Barnes WM. 1994. PCR amplification of up to 35-kb DNA with high fidelity and high yield from lambda bacteriophage templates. *Proc Natl Acad Sci USA* **91**: 2216–2220.

Gietz RD, Schiestl RH. 2007. Microtiter plate transformation using the LiAc/SS carrier DNA/PEG method. *Nat Protoc* **2**: 5–8.

Gietz RD, Woods RA. 2002. Transformation of yeast by lithium acetate/single-stranded carrier DNA/polyethylene glycol method. In *Guide to Yeast Genetics and Molecular and Cell Biology, Pt B*, Vol. 350 of *Methods in Enzymology*, pp. 87–96.

Sikorski RS, Hieter P. 1989. A system of shuttle vectors and yeast host strains designed for efficient manipulation of DNA in Saccharomyces cerevisiae. *Genetics* **122**: 19–27.

Swida U, Thuroff E, Steinert E, Kaufer NF. 1988. A non-conserved sequence in the 5’ region of the CYH2 Intron from Saccharomyces cerevisiae controls splicing efficiency of the pre-mRNA. *Yeast* **4**: 209–217.

**Supplemental Tables**

**DNA oligonucleotides used in this study**

| **Oligo #** | **Sequence (5’ to 3’)** | **Purpose** | **Source** |
| --- | --- | --- | --- |
| MS 109 | CGATAAAATGTCCAGTTGAAAACCTGTTTTACTAGCGATTTAAAAATTGTATTTCAT | Site-directed PCR Mutagenesis – Reporter BPS A to G mutation FWD | This work |
| MS 110 | ATGAAATACAATTTTTAAATCGCTAGTAAAACAGGTTTTCAACTGGACATTTTATCG | Site-directed PCR Mutagenesis – Reporter BPS A to G mutation REV | This work |
| MS 111 | TTTCATTACAATATTTTTTTTGTACTGCCGGTTAAGGTCGTATCTCT | Site-directed PCR Mutagenesis – Reporter 3’SS A to T mutation FWD | This work |
| MS 112 | AGAGATACGACCTTAACCGGCAGTACAAAAAAAATATTGTAATGAAA | Site-directed PCR Mutagenesis – Reporter 3’SS A to T mutation REV | This work |
| MS 257 | TCACGTCTCAGGCCGGTTAAGGTC | qPCR – Reporter mRNA FWD | This work |
| MS 258 | GCAGCTTGCCGGTGGTGCAGATG | qPCR – Reporter mRNA REV | This work |
| MS 303 | TAATAGAGGTGTACGCCGCAATCATTGTTAATCATTAAGTAATTGCCATTAGAGTGCACCATACCACAGC | PCR – mCherry-UFD2-GFP dimer FWD | This work |
| MS 304 | GTATCGGAAGGATCGGTGGTGATTTGTAAAATATCTTCTATGGCGGTCATCTTGTACAGCTCGTCCATGC | PCR – mCherry-UFD2-GFP dimer REV | This work |
| MS 309 | CGTTAAGCACCCAGCTGACA | qPCR – Reporter pre-mRNA FWD | This work |
|
| MS 310 | TGCATAACTGGACCGTCAGATG | qPCR – Reporter pre-mRNA REV | This work |
| MS 146 | GTGGGCGGCCGCTCCCATTACCGACATTTGGGCGCTA | PCR – *CUP1* Promoter FWD | This work |
| MS 147 | GTGGGGATCCTGATTGATTGATTGATTGTACAGTTTG | PCR – *CUP1* Promoter REV | This work |
|  |  |  |  |
| FWD = Forward primer, REV = Reverse primer, BPS = Branchpoint sequence, SS = Splice site | | | |

**Plasmids used in this study**

| **Plasmid #** | **Common Name** | **Purpose** | **Source** |
| --- | --- | --- | --- |
| MS 101 | pRS414 | Yeast Expression Vector | 1 |
| MS 103 | pRS416 | Empty vector for non-fluorescent control | 1 |
| MS 120 | pRS316 *RPL25*-GFP | Yeast expression vector with eGFP | 2 |
| MS 122 | pRS426 *TDH3*-mCherry | mCherry over expression control. Also used as template for dimer control | This work |
| MS 124 | Synthesized reporter fragment | Exon 1 through exon 2 | Mr. Gene. |
| MS 125 | pRS316 *TDH3*-GFP | eGFP over expression control. Also used to clone reporter | This work. Plasmids MS 120 and 130 |
| MS 127 | pRS316 *TDH3*-Reporter | *TDH3* driven reporter | This work. Plasmids MS 124 and 125 |
| MS 130 | pGEM *TDH3* | Cloning vector with *TDH3* promoter | This work |
| MS 135 | pRS316 *TDH3*-BPS mut reporter | BPS mutant reporter | This work. Plasmid MS 127 and oligos MS 109-110 |
| MS 136 | pRS316 *TDH3*-3’SS mut reporter | 3’SS mutant reporter | This work. Plasmid MS 127 and oligos MS 111-112 |
| MS 162 | TA *CUP1* Promoter | Cloning vector with *CUP1* promoter | This work. |
| MS 163 | pRS316-*CUP1*-Reporter | CEN *URA3* inducible reporter | This work. Plasmids 162 and 127. |
| MS 251 | pRS313 Reporter qPCR1-2-3 | qPCR Control Template | This work. |
| MS 283 | p*GAL1-RRP6* | *RRP6* overexpression clone from Yeast ORF Collection | Thermo Scientific |
| MS 382 | pRS426 *MEX67* | Wild-type *MEX67* expression | 3 |
| MS 388 | pRS414 *CUP1*-Reporter | CEN *HIS3* inducible Reporter | This work. Plasmids 101 and 163. |
| BPS = Branchpoint sequence, SS = Splice site | | |  |
|  |  |  |  |
| 1 | Sikorski, R. S. & Hieter, P. A system of shuttle vectors and yeast host strains designed for efficient manipulation of DNA in *Saccharomyces cerevisiae*. *Genetics* **122**, 19-27 (1989). | | |
| 2 | Gadal, O. *et al.* Nuclear export of 60S ribosomal subunits depends on Xpo1p and requires a nuclear export sequence-containing factor, Nmd3p that associates with the large subunit protein Rpl10p. *Mol. Cell. Biol.* **21**, 3405-3415 (2001). | | |
| 3 | Nai-Jung Hung *et al*. Arx1 Is a Nuclear Export Receptor for the 60S Ribosomal Subunit in Yeast. *Mol Biol Cell* **19**(2): 735-744 (2008). | | |
