# Supplementary material
Source: HighWire-hosted journal article supplement (doi:10.1101/rna.042663.113)
Supplement: SuppTab3.xlsx [file SuppTab3.xlsx]

## Sheet: Sheet1
Red-shifted Mutants	Green-shifted Mutants
SEO1 / YAL067C	THP1 / YOL072W
MCK1 / YNL307C	SAC3 / YDR159W
IRC25 / YLR021W	ARC18 / YLR370C
MRP51 / YPL118W	GBP2 / YCL011C
AIM43 / YPL099C	CCR4 / YAL021C
MGR2 / YPL098C	XRN1 / YGL173C
EEB1 / YPL095C	NUP120 / YKL057C
YGR071C / YGR071C	GSH1 / YJL101C
CAF40 / YNL288W	MLP1 / YKR095W
MUD2 / YKL074C	SEM1 / YDR363W-A
RTF1 / YGL244W	RRP6 / YOR001W
POC4 / YPL144W	DHH1 / YDL160C
ELP4 / YPL101W	THP2 / YHR167W
BEM4 / YPL161C	SUS1 / YBR111W-A
EBS1 / YDR206W	YNL140C / YNL140C
YOR352W / YOR352W	PLC1 / YPL268W
BUB3 / YOR026W	MFT1 / YML062C
SEF1 / YBL066C	MMP1 / YLL061W
YHI9 / YHR029C	UBR2 / YLR024C
SWT21 / YNL187W	NEW1 / YPL226W
YNR004W / YNR004W	NUP60 / YAR002W
ATG14 / YBR128C	ACE2 / YLR131C
RPN10 / YHR200W	ARG82 / YDR173C
QCR8 / YJL166W	DEF1 / YKL054C
PAC10 / YGR078C	YGR031W / YGR031W
YPL150W / YPL150W	RPS22A / YJL190C
SGO1 / YOR073W	LTV1 / YKL143W
HOS3 / YPL116W	EFG1 / YGR271C-A
YPL107W / YPL107W	POP2 / YNR052C
MTC7 / YEL033W
ATG21 / YPL100W
RPL34A / YER056C-A
UBA4 / YHR111W
RPN4 / YDL020C
BUD32 / YGR262C
APM4 / YOL062C
RER1 / YCL001W
CNB1 / YKL190W
FMP25 / YLR077W
PCL8 / YPL219W
DGR2 / YKL121W
YKL102C / YKL102C
NQM1 / YGR043C
YDR133C / YDR133C
PRD1 / YCL057W
MAK32 / YCR019W
CRG1 / YHR209W
CKI1 / YLR133W
DPB4 / YDR121W
ILV6 / YCL009C
YCR001W / YCR001W
POL4 / YCR014C
ZRT2 / YLR130C
VBA3 / YCL069W
TIS11 / YLR136C
YKL171W / YKL171W
TPO5 / YKL174C
SCM4 / YGR049W
YGR051C / YGR051C
ISW2 / YOR304W
YBR174C / YBR174C
TAL1 / YLR354C
YNL170W / YNL170W
RAV2 / YDR202C
IRC15 / YPL017C
YDJ1 / YNL064C
BDF1 / YLR399C
BCK1 / YJL095W
EAF1 / YDR359C
RPL42B / YHR141C
FAB1 / YFR019W
SNU66 / YOR308C
AAT2 / YLR027C
RRT2 / YBR246W
YJL169W / YJL169W
SWC3 / YAL011W
ARP6 / YLR085C
SPT8 / YLR055C
HTZ1 / YOL012C
YML081W / YML081W
YMR027W / YMR027W
YLR358C / YLR358C
RSN1 / YMR266W
RTN1 / YDR233C
YPT7 / YML001W
YDR239C / YDR239C
COX20 / YDR231C
LYS4 / YDR234W
MRPL7 / YDR237W
YOR305W / YOR305W
STE5 / YDR103W
YEA4 / YEL004W
RPD3 / YNL330C
BUD16 / YEL029C
TAF14 / YPL129W
CSE2 / YNR010W
SRB5 / YGR104C
SOH1 / YGL127C
IWR1 / YDL115C
FIR1 / YER032W
SRB2 / YHR041C
RTR1 / YER139C
VPS72 / YDR485C
DST1 / YGL043W
IRC19 / YLL033W
SET2 / YJL168C
VPS71 / YML041C
VPS72 / YDR485C
NMD2 / YHR077C
UPF3 / YGR072W
NAM7 / YMR080C
YOR309C / YOR309C
RIM1 / YCR028C-A
UME6 / YDR207C
LEA1 / YPL213W
IST3 / YIR005W
MET6 / YER091C
BUD13 / YGL174W
